# Supplementary material for: Heterogeneous pathway activation and drug response modelled in colorectal-tumor-derived 3D cultures
Source: PLoS Genet. 2019 Mar 29;15(3):e1008076. doi: 10.1371/journal.pgen.1008076 (PMC6457557; doi:10.1371/journal.pgen.1008076)
Supplement: S10 Table — (XLSX) [file pgen.1008076.s015.xlsx]

## Sheet: S10 Table
S10 Table. PDX tumor volumes of single and mixed populations of CC0514-R1 and -R4 cells
in vivo model		TV [cm³] at day x post engraftment
	replicate	5	7	11	14	18	21	25	28	32	36	39	42	47	49	53	56	60	63	68	70	74	77	81
CC0514-R1	1	0.136	0.281	0.447	0.611	1.196
	2	0.189	0.287	0.325	0.706	1.516
	3	0.157	0.249	0.456	0.864	1.352
Mean		0.160667	0.272333	0.409333	0.727	1.35467
SD		0.0266896	0.0204287	0.0731733	0.127801	0.160017
CC0514-R4	1	0.098	0.063	0.048	0.078	0.081	0.122	0.16	0.202	0.228	0.243	0.321	0.355	0.411	0.471	0.511	0.492	0.516	0.73	0.733	1.163	0.858	1.115	1.43
	2	0.085	0.101	0.105	0.101	0.116	0.223	0.25	0.258	0.416	0.406	0.297	0.37	0.508	0.556	0.574	0.481	0.441	0.398	0.438	0.411	0.21	0.19	0.112
	3	0.16	0.152	0.181	0.07	0.143	0.212	0.236	0.288	0.309	0.301	0.316	0.396	0.388	0.418	0.402	0.437	0.483	0.563	0.561	0.829	0.445	0.581	0.726
Mean		0.114333	0.105333	0.111333	0.083	0.113333	0.185667	0.215333	0.249333	0.317667	0.316667	0.311333	0.373667	0.435667	0.481667	0.495667	0.47	0.48	0.563667	0.577333	0.801	0.504333	0.628667	0.756
SD		0.0400791	0.044658	0.0667258	0.0160935	0.0310859	0.0554106	0.0484286	0.0436501	0.0942992	0.0826216	0.0126623	0.0207445	0.0636894	0.0696156	0.0870192	0.0291033	0.0375899	0.166001	0.148177	0.376781	0.328049	0.464339	0.659512
CC0514-R1/R4 mix	1	0.126	0.184	0.228	0.302	0.497	0.893	1.336	3.384	4.729
	2	0.116	0.156	0.172	0.135	0.435	0.775	0.684	1.422	1.593
	3	0.126	0.108	0.111	0.175	0.234	0.384	0.564	0.769	1.819
Mean		0.101406	0.117705	0.138244	0.168597	0.333737	0.587038	0.683272	1.6404	2.14983
SD		0.0057735	0.0384361	0.0585178	0.0871952	0.137486	0.266423	0.415429	1.36101	1.74898
TV = tumor volume
