# Supplementary material for: Heterogeneous pathway activation and drug response modelled in colorectal-tumor-derived 3D cultures
Source: PLoS Genet. 2019 Mar 29;15(3):e1008076. doi: 10.1371/journal.pgen.1008076 (PMC6457557; doi:10.1371/journal.pgen.1008076)
Supplement: S12 Table — (XLSX) [file pgen.1008076.s017.xlsx]

## Sheet: S12 Table
S12 Table. FACS results – GFP+/mCherry+ fractions and fold enrichment
in vivo model group	replicate	GFP+ fraction	mCh+ fraction	fold enrichment
				GFP+	mCh+
vehicle	1	0.74	0.26	2.84615
	2	0.74	0.26	2.84615
	3	0.83	0.17	4.88235
cetuximab	1	0.87	0.13	6.69231
	2	0.93	0.07	13.2857
	3	0.35	0.65		1.85714
regorafenib	1	0.86	0.14	6.14286
	2	0.19	0.81		4.26316
	3	NA	NA	-	-
everolimus	1	0.65	0.35	1.85714
	2	0.63	0.37	1.7027
	3	0.5	0.5	1
trametinib	1	0.53	0.47	1.12766
	2	0.81	0.19	4.26316
	3	0.94	0.06	15.6667
pictilisib	1	0.87	0.13	6.69231
	2	0.63	0.37	1.7027
	3	0.74	0.26	2.84615
cetuximab+regorafenib	1	0.92	0.08	11.5
	2	0.42	0.58		1.38095
	3	0.08	0.92		11.5
cetuximab+everolimus	1	0.79	0.21	3.7619
	2	0.06	0.94		15.6667
	3	0.79	0.21	3.7619
cetuximab+trametinib	1	0.33	0.67		2.0303
	2	0.19	0.81		4.26316
	3	0.29	0.71		2.44828
cetuximab+pictilisib	1	0.79	0.21	3.7619
	2	0.06	0.94		15.6667
	3	0.65	0.35	1.85714
