# Supplementary material for: Heterogeneous pathway activation and drug response modelled in colorectal-tumor-derived 3D cultures
Source: PLoS Genet. 2019 Mar 29;15(3):e1008076. doi: 10.1371/journal.pgen.1008076 (PMC6457557; doi:10.1371/journal.pgen.1008076)
Supplement: S13 Table — (XLSX) [file pgen.1008076.s018.xlsx]

## Sheet: S13 Table
S13 Table. Panel sequencing results compared to whole exome/genome data from Schütte et al. [11]
patient_ID	PD3D_ID	in_panel_seq	in_exome_seq	alteration	symbol	type	canon._AAchange	chr	pos	ref	var	Schutte_Exome_PD3D_var/tot	Schutte_Exome_PD3D_varfreq
108-CB-P	OT108-PDX	x	x	Indel_frameshift deletion	APC	protein_coding	S1426fs	5	112175568	GC	G	60/60	1
108-CB-P	OT108-PDX	x	x	SNV_nonsynonymous SNV	TP53	protein_coding	R273C	17	7577121	G	A	13/18	0.722222
114-CB-P	OT114-PDX	x	x	Indel_frameshift insertion	APC	protein_coding	S1341fs	5	112175313	G	GT	44/44	1
114-CB-P	OT114-PDX	x	x	SNV_nonsynonymous SNV	KRAS	protein_coding	G12V	12	25398284	C	A	42/75	0.56
114-CB-P	OT114-PDX	x	x	SNV_nonsynonymous SNV	PIK3CA	protein_coding	E545G	3	178936092	A	G	1/18	0.0555556
116-CB-P	OT116-PDX	x	x	Indel_frameshift insertion	APC	protein_coding	H1490fs	5	112175760	A	AT	13/26	0.5
116-CB-P	OT116-PDX	x	x	SNV_stopgain SNV	APC	protein_coding	R876X	5	112173917	C	T	13/61	0.213115
116-CB-P	OT116-PDX	x	x	SNV_nonsynonymous SNV	PIK3CA	protein_coding	C420R	3	178927980	T	C	5/7	0.714286
151-ML-M	OT151	-	x	Indel_frameshift deletion	APC	protein_coding	664_665del	5	112173282	CTT	C	7/27	0.26
151-ML-M	OT151	x	x	Indel_frameshift insertion	APC	protein_coding	I1307fs	5	112175211	T	TA	15/26	0.58
151-ML-M	OT151	x	x	SNV_nonsynonymous SNV	NRAS	protein_coding	Q61K	1	115256530	G	T	31/71	0.43662
151-ML-M	OT151	x	x	SNV_nonsynonymous SNV	TP53	protein_coding	G266E	17	7577141	C	T	61/64	0.953125
152-CB-P	OT152	-	x	Indel_frameshift deletion	APC	protein_coding	S1400fs	5	112175490	CG	C	3/4	0.75
152-CB-P	OT152	-	x	SNV_stopgain SNV	APC	protein_coding	R216X	5	112128143	C	T	28/81	0.345679
155-MB-P	OT155-PDX	x	x	SNV_stopgain SNV	APC	protein_coding	E1322X	5	112175255	G	T	12/19	0.631579
155-MB-P	OT155-PDX	x	x	Indel_frameshift insertion	TP53	protein_coding	S149fs	17	7578484	G	GA	55/56	0.98
155-MB-P	OT155-PDX	-	x	SNV_stopgain SNV	APC	protein_coding	R213X	5	112116592	C	T	31/62	0.5
155-MB-P	OT155-PDX	x	x	SNV_nonsynonymous SNV	KRAS	protein_coding	G12V	12	25398284	C	A	45/47	0.957447
159-MB-P	OT159	x	x	Indel_frameshift deletion	SMAD4	protein_coding	142_143del	18	48575665	ATC	A	--	--
159-MB-P	OT159	x	x	SNV_nonsynonymous SNV	KRAS	protein_coding	G13D	12	25398281	C	T	78/106	0.735849
159-MB-P	OT159	x	x	Indel_frameshift deletion	TP53	protein_coding	152_156del	17	7578463	CGGGTGCCGGGCGG	C	--	--
159-MB-P	OT159	x	x	SNV_stopgain SNV	APC	protein_coding	Q1294X	5	112175171	C	T	18/38	0.473684
161-MW-P	OT159	x	x	Indel_frameshift insertion	APC	protein_coding	E1554fs	5	112175951	G	GA	--	--
161-MW-P	OT161-PDX	-	x	SNV_stopgain SNV	APC	protein_coding	S457X	5	112157650	C	A	12/38	0.315789
161-MW-P	OT161-PDX	x	x	SNV_nonsynonymous SNV	KRAS	protein_coding	G12S	12	25398285	C	T	18/51	0.352941
161-MW-P	OT161-PDX	x	x	SNV_nonsynonymous SNV	PIK3CA	protein_coding	H1047R	3	178952085	A	G	6/14	0.428571
161-MW-P	OT161-PDX	x	x	Indel_nonframeshift insertion	TP53	protein_coding	K132delinsTLNK	17	7578535	T	TTGTTGAGGG	--	--
162-MW-P	OT162	-	x	Indel_frameshift deletion	APC	protein_coding	625_626del	5	112170776	CCAGA	C	32/86	0.37
162-MW-P	OT162	-	x	SNV_stopgain SNV	APC	protein_coding	Q1406X	5	112175507	C	T	12/19	0.631579
162-MW-P	OT162	x	x	SNV_stopgain SNV	APC	protein_coding	R876X	5	112173917	C	T	40/90	0.444444
162-MW-P	OT162	x	x	SNV_nonsynonymous SNV	SMAD4	protein_coding	D351Y	18	48591888	G	T	23/24	0.958333
163-CB-P	OT163	-	x	SNV_stopgain SNV	APC	protein_coding	R283X	5	112151204	C	T	--/--	--
163-CB-P	OT163	x	x	SNV_nonsynonymous SNV	KRAS	protein_coding	A146T	12	25378562	C	T	--/--	--
163-CB-P	OT163	x	x	SNV_nonsynonymous SNV	PIK3CA	protein_coding	R115P	3	178916957	G	C	--/--	--
170-ML-P	OT170	-	x	SNV_stopgain SNV	APC	protein_coding	R283X	5	112151204	C	T	70/101	0.693069
170-ML-P	OT170	x	x	Indel_frameshift deletion	APC	protein_coding	K1437fs	5	112175599	TA	T	22/98	0.22
170-ML-P	OT170	x	x	SNV_nonsynonymous SNV	BRAF	protein_coding	G466R	7	140481412	C	T	54/117	0.461538
170-ML-P	OT170	x	x	SNV_nonsynonymous SNV	PIK3CA	protein_coding	H1047R	3	178952085	A	G	46/46	1
170-ML-P	OT170	x	x	SNV_nonsynonymous SNV	TP53	protein_coding	R213Q	17	7578211	C	T	22/24	0.916667
190-MB-P	OT190	-	x	Indel_frameshift deletion	APC	protein_coding	P429fs	5	112155013	AC	A	32/99	0.32
190-MB-P	OT190	x	x	Indel_frameshift insertion	APC	protein_coding	T1493fs	5	112175769	C	CA	20/34	0.59
190-MB-P	OT190	x	x	SNV_nonsynonymous SNV	NRAS	protein_coding	Q61K	1	115256530	G	T	59/79	0.746835
209-MB-P-MF	OT209-M	x	x	Indel_frameshift deletion	APC	protein_coding	1307_1309del	5	112175211	TAAAAG	T	25/25	1
209-MB-P-MF	OT209-M	x	x	SNV_nonsynonymous SNV	FBXW7	protein_coding	L594F	4	153245411	G	A	39/40	0.975
209-MB-P-MF	OT209-M	x	x	SNV_nonsynonymous SNV	KRAS	protein_coding	G12V	12	25398284	C	A	45/98	0.459184
209-MB-P-MF	OT209-M	x	x	SNV_nonsynonymous SNV	TP53	protein_coding	R175H	17	7578406	C	T	15/15	1
209-MB-P-TF	OT209-P	x	x	Indel_frameshift deletion	APC	protein_coding	1307_1309del	5	112175211	TAAAAG	T	--	--
209-MB-P-TF	OT209-P	x	x	SNV_nonsynonymous SNV	FBXW7	protein_coding	L594F	4	153245411	G	A	--/--	--
209-MB-P-TF	OT209-P	x	x	SNV_nonsynonymous SNV	KRAS	protein_coding	G12V	12	25398284	C	A	--/--	--
209-MB-P-TF	OT209-P	x	x	SNV_nonsynonymous SNV	TP53	protein_coding	R175H	17	7578406	C	T	--/--	--
216-ML-P	OT216	x	x	Indel_frameshift deletion	APC	protein_coding	T1487fs	5	112175751	CT	C	16/24	0.67
216-ML-P	OT216	-	x	SNV_splicing	TP53	protein_coding	--	17	7590693	A	T	65/67	0.970149
216-ML-P	OT216	x	x	SNV_stopgain SNV	APC	protein_coding	R876X	5	112173917	C	T	27/76	0.355263
227-ML-P	OT227	x	x	Indel_frameshift deletion	APC	protein_coding	I1579fs	5	112176026	AT	A	23/26	0.88
227-ML-P	OT227	x	x	SNV_nonsynonymous SNV	KRAS	protein_coding	G13D	12	25398281	C	T	50/104	0.480769
227-ML-P	OT227	x	x	SNV_nonsynonymous SNV	TP53	protein_coding	V272L	17	7577124	C	A	57/57	1
234-MB-P	OT234	x	x	SNV_stopgain SNV	APC	protein_coding	E1353X	5	112175348	G	T	80/80	1
234-MB-P	OT234	x	x	SNV_nonsynonymous SNV	TP53	protein_coding	T253P	17	7577524	T	G	26/26	1
238-CB-P	OT238	-	x	Indel_frameshift deletion	APC	protein_coding	N550fs	5	112164573	GA	G	35/51	0.69
238-CB-P	OT238	x	x	SNV_nonsynonymous SNV	KRAS	protein_coding	G12D	12	25398284	C	T	39/62	0.629032
238-CB-P	OT238	x	x	SNV_nonsynonymous SNV	SMAD4	protein_coding	C499Y	18	48604674	G	A	6/6	1
238-CB-P	OT238	x	x	SNV_nonsynonymous SNV	TP53	protein_coding	R273H	17	7577120	C	T	69/70	0.985714
239-CB-P	OT239	-	x	SNV_stopgain SNV	APC	protein_coding	Y935X	5	112174096	C	A	13/13	1
239-CB-P	OT239	x	x	SNV_nonsynonymous SNV	KRAS	protein_coding	G13D	12	25398281	C	T	43/77	0.558442
239-CB-P	OT239	x	x	SNV_nonsynonymous SNV	TP53	protein_coding	R175H	17	7578406	C	T	25/25	1
250-MW-P	OT250	x	x	Indel_frameshift deletion	TP53	protein_coding	N210fs	17	7578219	GT	G	31/32	0.97
261-MB-P	OT261	-	x	SNV_stopgain SNV	APC	protein_coding	E140X	5	112103083	G	T	4/7	0.571429
261-MB-P	OT261	-	x	Indel_nonframeshift deletion	PTEN	protein_coding	32_32del	10	89653795	CATT	C	24/63	0.38
261-MB-P	OT261	x	x	Indel_frameshift deletion	APC	protein_coding	1462_1462del	5	112175675	AAG	A	29/52	0.56
261-MB-P	OT261	x	x	Indel_frameshift deletion	APC	protein_coding	E1547fs	5	112175930	GA	G	8/23	0.35
261-MB-P	OT261	x	x	SNV_nonsynonymous SNV	BRAF	protein_coding	V600E	7	140453136	A	T	67/132	0.507576
261-MB-P	OT261	x	x	Indel_frameshift deletion	PTEN	protein_coding	6_6del	10	89624241	CAA	C	29/85	0.34
276-MB-P	OT276	-	x	Indel_frameshift deletion	APC	protein_coding	E211fs	5	112116586	GA	G	0/0	0
276-MB-P	OT276	x	x	SNV_nonsynonymous SNV	TP53	protein_coding	C176F	17	7578403	C	A	25/26	0.961538
278-ML-P	OT278	-	x	Indel_frameshift deletion	APC	protein_coding	K586fs	5	112170659	CA	C	0/0	0
278-ML-P	OT278	-	x	SNV_stopgain SNV	APC	protein_coding	Q223X	5	112128164	C	T	39/83	0.46988
278-ML-P	OT278	x	x	SNV_nonsynonymous SNV	EGFR	protein_coding	A822T	7	55249166	G	A	13/22	0.590909
278-ML-P	OT278	x	x	Indel_frameshift insertion	PTEN	protein_coding	T321fs	10	89720811	C	CA	0/3	0
281-CB-P	OT281	x	x	SNV_stopgain SNV	APC	protein_coding	E1379X	5	112175426	G	T	54/54	1
281-CB-P	OT281	x	x	SNV_stopgain SNV	PTEN	protein_coding	R233X	10	89717672	C	T	114/116	0.982759
288-CB-M	OT288	-	x	Indel_frameshift deletion	APC	protein_coding	S1010fs	5	112174320	GT	G	13/22	0.59
288-CB-M	OT288	x	x	Indel_frameshift deletion	APC	protein_coding	L1489fs	5	112175757	TA	T	0/0	0
288-CB-M	OT288	x	x	SNV_nonsynonymous SNV	KRAS	protein_coding	G12D	12	25398284	C	T	40/82	0.487805
288-CB-M	OT288	x	x	Indel_frameshift deletion	TP53	protein_coding	180_183del	17	7578382	GAGCAGCGCTC	G	29/29	1
292-CB-M	OT292	-	x	Indel_frameshift deletion	APC	protein_coding	1397_1397del	5	112175479	TGA	T	4/4	1
292-CB-M	OT292	x	x	SNV_nonsynonymous SNV	TP53	protein_coding	R248W	17	7577539	G	A	45/45	1
299-MB-P	OT299	x	x	SNV_nonsynonymous SNV	PIK3CA	protein_coding	Y1021C	3	178952007	A	G	34/68	0.5
299-MB-P	OT299	x	x	SNV_nonsynonymous SNV	PIK3CA	protein_coding	C420R	3	178927980	T	C	6/10	0.6
300-CB-P	OT300	x	x	SNV_nonsynonymous SNV	KRAS	protein_coding	G13D	12	25398281	C	T	30/73	0.410959
300-CB-P	OT300	x	x	SNV_nonsynonymous SNV	PIK3CA	protein_coding	E545K	3	178936091	G	A	29/56	0.517857
300-CB-P	OT300	x	x	SNV_stopgain SNV	TP53	protein_coding	R342X	17	7574003	G	A	63/64	0.984375
302-CB-M	OT302	x	x	Indel_frameshift insertion	APC	protein_coding	T1487fs	5	112175751	C	CT	9/9	1
302-CB-M	OT302	x	x	SNV_nonsynonymous SNV	KRAS	protein_coding	G12D	12	25398284	C	T	36/69	0.521739
315-CB-M	OT315	x	x	SNV_stopgain SNV	APC	protein_coding	G1357X	5	112175360	G	T	48/50	0.96
315-CB-M	OT315	x	x	SNV_nonsynonymous SNV	TP53	protein_coding	C135Y	17	7578526	C	T	1/1	1
319-CB-P	OT319	x	x	SNV_nonsynonymous SNV	PIK3CA	protein_coding	K111E	3	178916944	A	G	59/108	0.546296
319-CB-P	OT319	x	x	Indel_nonframeshift deletion	TP53	protein_coding	218_218del	17	7578194	GCAC	G	13/13	1
323-MB-P	OT323	-	x	SNV_stopgain SNV	APC	protein_coding	R213X	5	112116592	C	T	33/70	0.471429
323-MB-P	OT323	-	x	SNV_nonsynonymous SNV	PIK3CA	protein_coding	A775S	3	178942516	G	T	17/39	0.435897
323-MB-P	OT323	x	x	SNV_nonsynonymous SNV	KRAS	protein_coding	G12D	12	25398284	C	T	22/55	0.4
323-MB-P	OT323	x	x	SNV_nonsynonymous SNV	PIK3CA	protein_coding	G1049R	3	178952090	G	C	7/16	0.4375
323-MB-P	OT323	x	x	SNV_nonsynonymous SNV	PIK3CA	protein_coding	R88Q	3	178916876	G	A	28/58	0.482759
326-MB-P	OT326	-	x	SNV_stopgain SNV	APC	protein_coding	Q1228X	5	112174973	C	T	7/17	0.411765
326-MB-P	OT326	x	x	Indel_frameshift deletion	APC	protein_coding	1308_1309del	5	112175214	AAG	A	2/14	0.14
326-MB-P	OT326	x	x	SNV_stopgain SNV	TP53	protein_coding	W91X	17	7579415	C	T	7/8	0.875
327-MB-P	OT327	-	x	SNV_stopgain SNV	APC	protein_coding	R499X	5	112162891	C	T	9/26	0.346154
327-MB-P	OT327	x	x	Indel_frameshift deletion	APC	protein_coding	1462_1462del	5	112175675	AAG	A	13/37	0.35
327-MB-P	OT327	x	x	SNV_nonsynonymous SNV	BRAF	protein_coding	G466V	7	140481411	C	A	38/80	0.475
327-MB-P	OT327	x	x	SNV_nonsynonymous SNV	EGFR	protein_coding	A864V	7	55259533	C	T	21/37	0.567568
327-MB-P	OT327	x	x	SNV_nonsynonymous SNV	FBXW7	protein_coding	R465H	4	153249384	C	T	1/2	0.5
327-MB-P	OT327	x	x	SNV_nonsynonymous SNV	PIK3CA	protein_coding	H1047Y	3	178952084	C	T	11/16	0.6875
327-MB-P	OT327	x	x	SNV_stopgain SNV	PIK3CA	protein_coding	R537X	3	178936067	C	T	16/41	0.390244
330-MB-P	OT330	-	x	SNV_nonsynonymous SNV	PIK3CA	protein_coding	E39K	3	178916728	G	A	9/16	0.5625
330-MB-P	OT330	x	x	SNV_stopgain SNV	APC	protein_coding	Q1294X	5	112175171	C	T	23/24	0.958333
330-MB-P	OT330	x	x	SNV_nonsynonymous SNV	SMAD4	protein_coding	A118T	18	48575158	G	A	8/8	1
330-MB-P	OT330	x	x	SNV_nonsynonymous SNV	TP53	protein_coding	R213Q	17	7578211	C	T	10/10	1
347-ML-M	OT347-M02	x	x	Indel_frameshift deletion	APC	protein_coding	F1354fs	5	112175350	AT	A	73/78	0.94
347-ML-M	OT347-M02	x	x	SNV_nonsynonymous SNV	TP53	protein_coding	R248Q	17	7577538	C	T	47/47	1
347-ML-M	OT347-M02	x	x	Indel_frameshift deletion	APC	protein_coding	F1354fs	5	112175350	AT	A	81/83	0.98
347-ML-M	OT347-M02	x	x	SNV_nonsynonymous SNV	TP53	protein_coding	R248Q	17	7577538	C	T	45/45	1
351-ML-P	OT351	-	x	SNV_stopgain SNV	APC	protein_coding	W699X	5	112173388	G	A	60/97	0.618557
351-ML-P	OT351	x	x	SNV_stopgain SNV	APC	protein_coding	Q1429X	5	112175576	C	T	19/65	0.292308
351-ML-P	OT351	x	x	SNV_nonsynonymous SNV	KRAS	protein_coding	G12D	12	25398284	C	T	48/48	1
351-ML-P	OT351	x	x	SNV_nonsynonymous SNV	PIK3CA	protein_coding	E453K	3	178928079	G	A	47/57	0.824561
351-ML-P	OT351	x	x	SNV_nonsynonymous SNV	TP53	protein_coding	R282W	17	7577094	G	A	69/70	0.985714
352-CB-M	OT352	-	x	Indel_frameshift deletion	APC	protein_coding	914_914del	5	112174030	TTG	T	8/22	0.36
352-CB-M	OT352	-	x	SNV_stopgain SNV	APC	protein_coding	C1410X	5	112175521	C	A	16/20	0.8
352-CB-M	OT352	x	x	SNV_nonsynonymous SNV	KRAS	protein_coding	G12S	12	25398285	C	T	60/60	1
352-CB-M	OT352	x	x	SNV_nonsynonymous SNV	PIK3CA	protein_coding	H1047R	3	178952085	A	G	6/15	0.4
364-CB-M	OT364	-	x	SNV_stopgain SNV	APC	protein_coding	S811X	5	112173723	C	G	7/8	0.875
364-CB-M	OT364	x	x	Indel_frameshift deletion	APC	protein_coding	1376_1376del	5	112175416	CTA	C	3/32	0.09
364-CB-M	OT364	x	x	SNV_splicing	TP53	protein_coding		17	7578369	A	C	6/6	1
